# Supplementary material for: A divergent synthesis of 2-acyl derivatives of PUGNAc yields selective inhibitors of O-GlcNAcase
Source: Royal Society of Chemistry journal article supplement (doi:10.1039/b516273d), 2006-01-01

Supplementary Material for Organic & Biomolecular Chemistry  
This journal is © The Royal Society of Chemistry 2006

**Electronic supplementary information (ESI): NMR spectra of inhibitors.**

**Keith A. Stubbs, Nelson Zhang and David J. Vocadlo<sup>a</sup>**



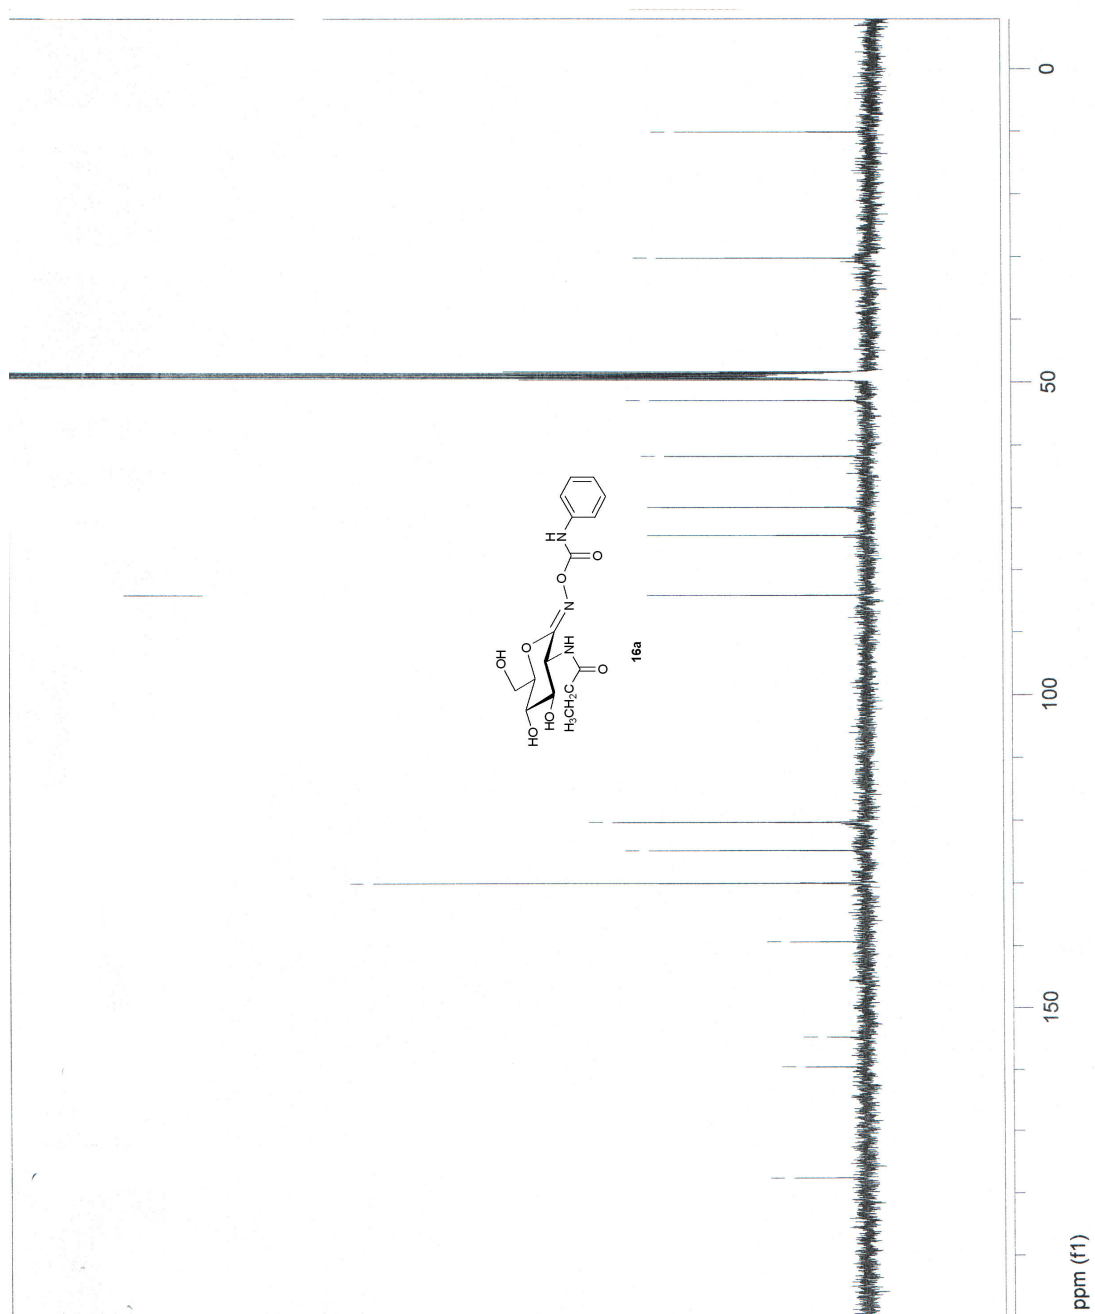

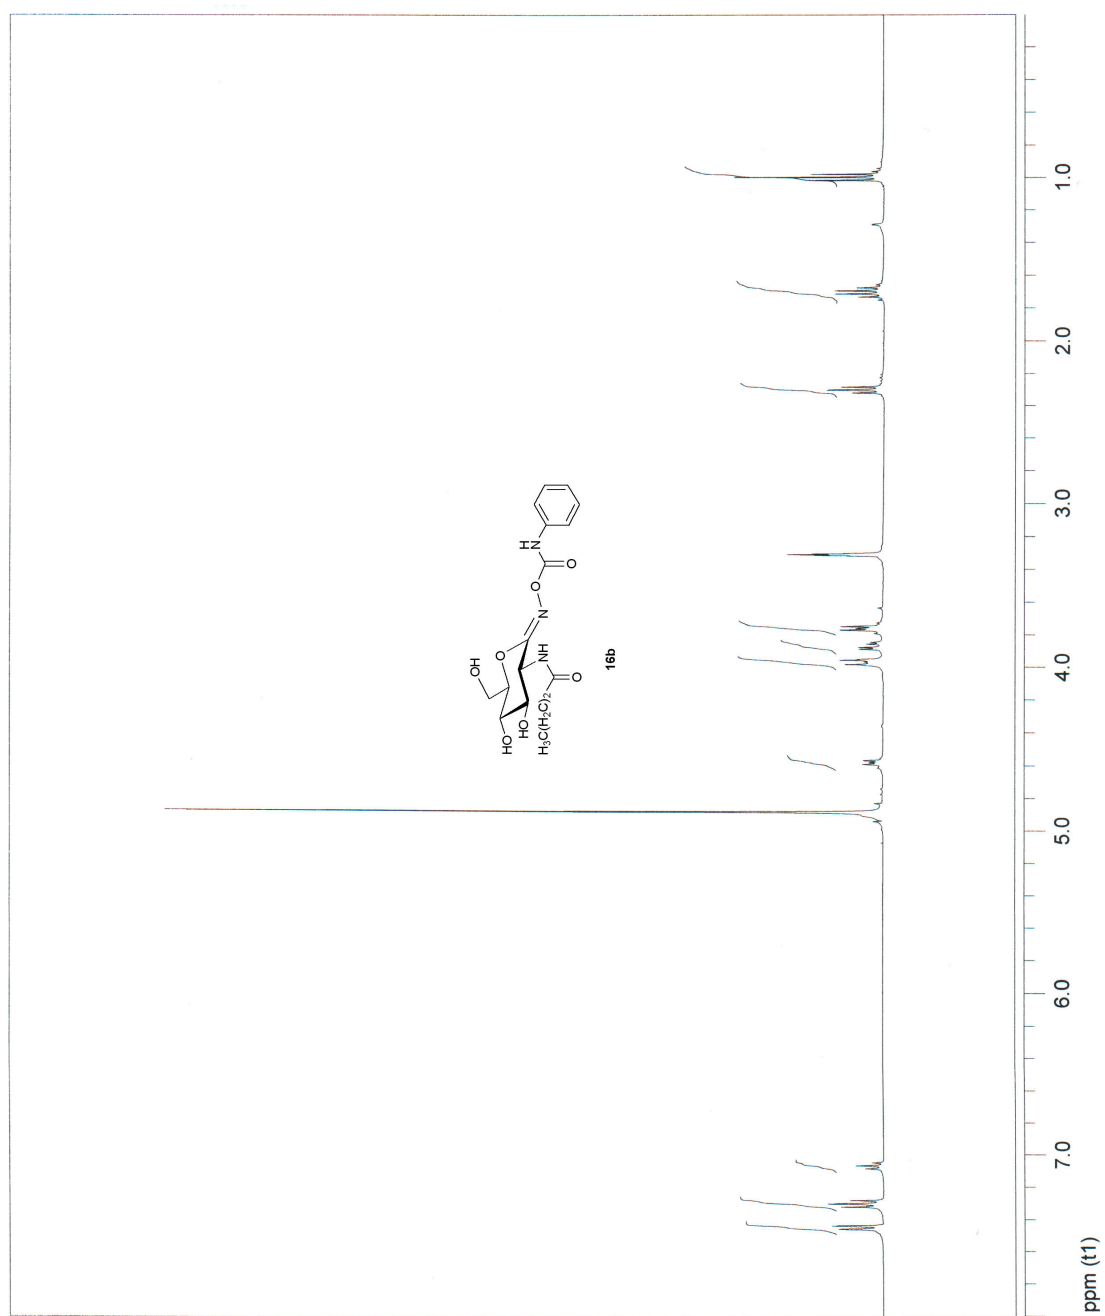

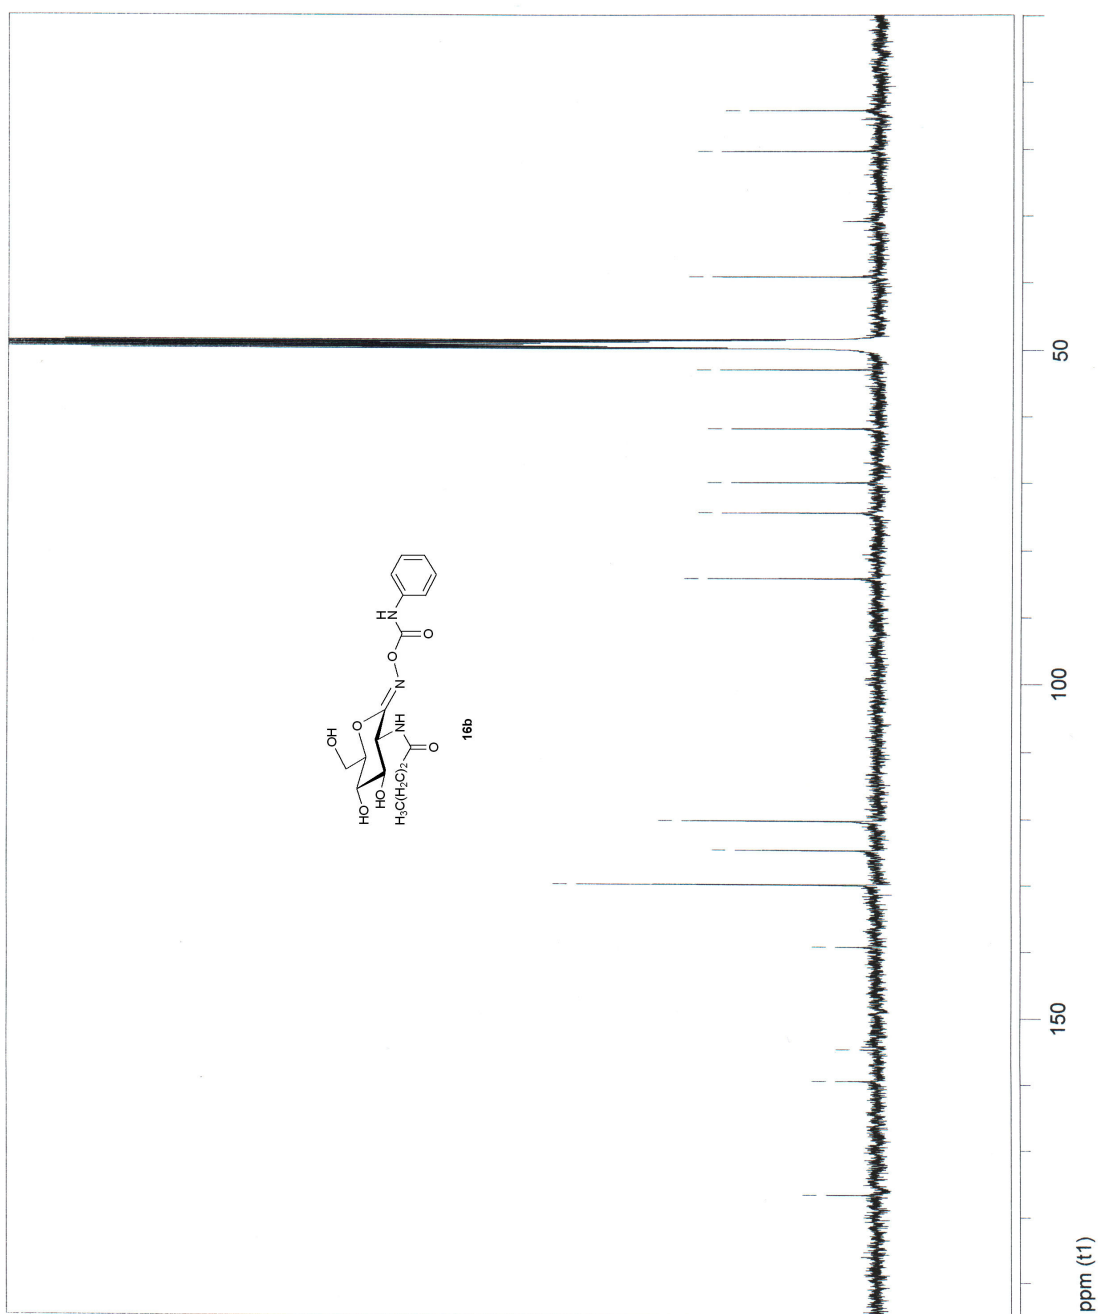

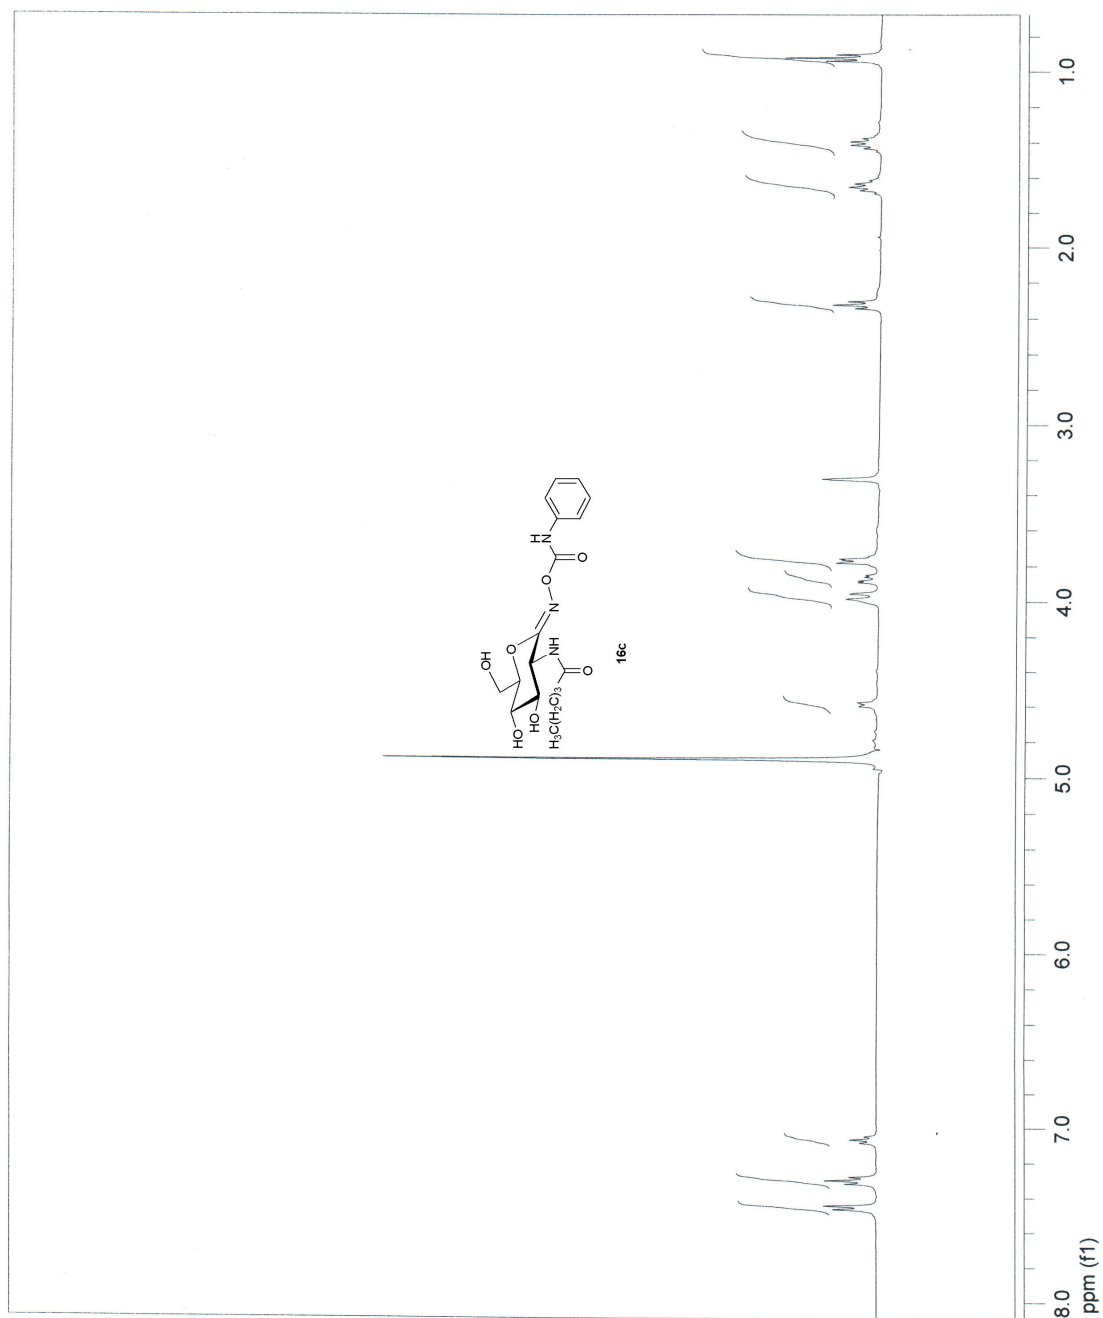

Supplementary Material for Organic & Biomolecular Chemistry  
This journal is © The Royal Society of Chemistry 2006

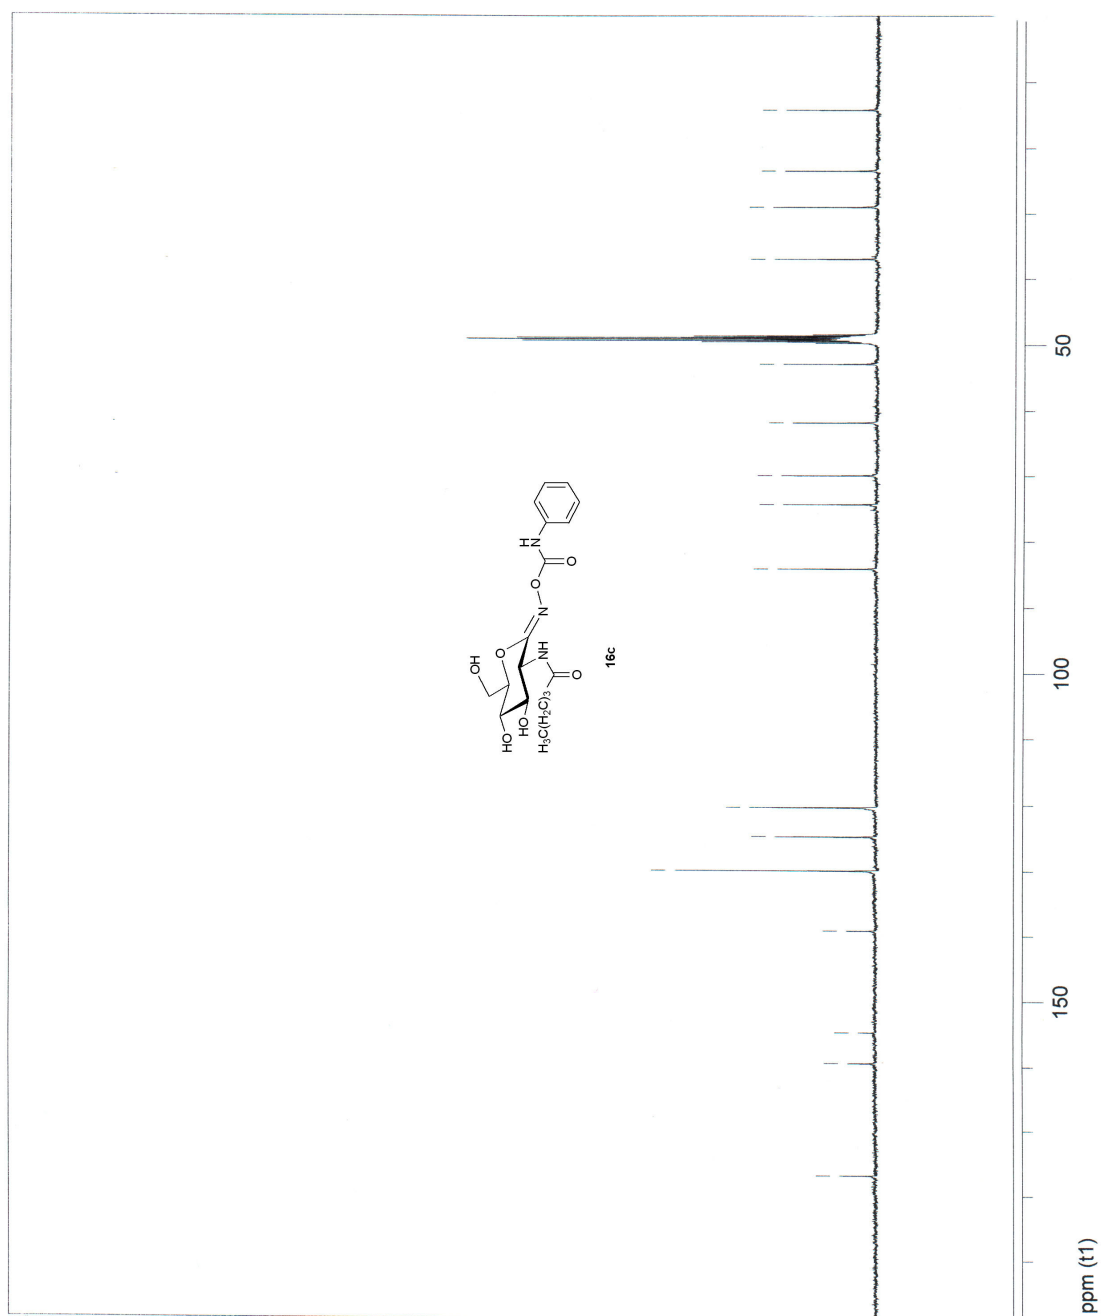

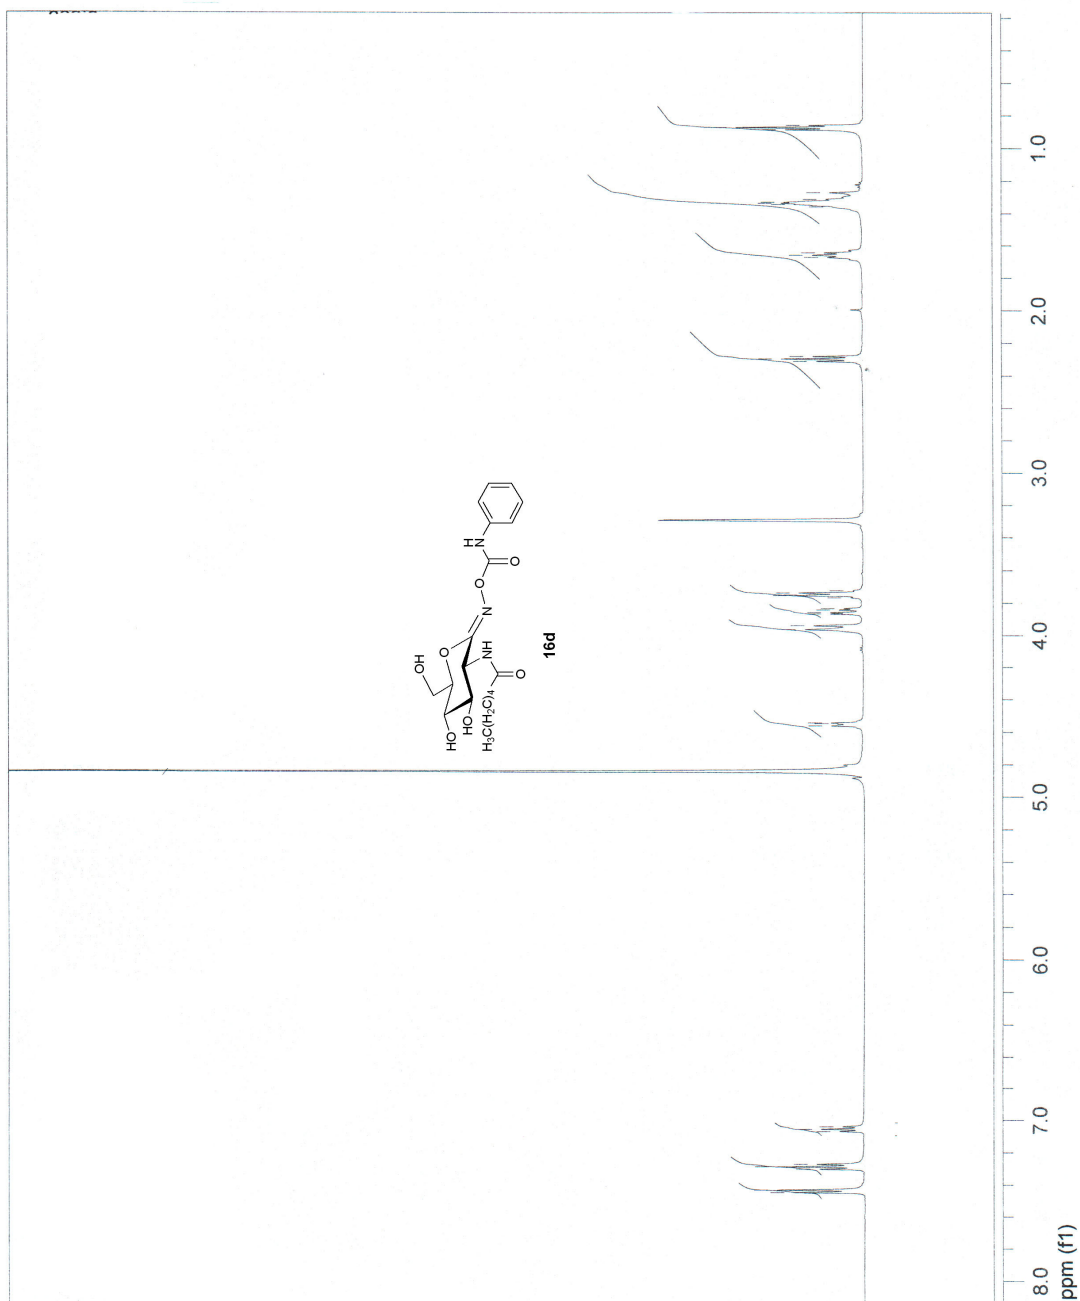



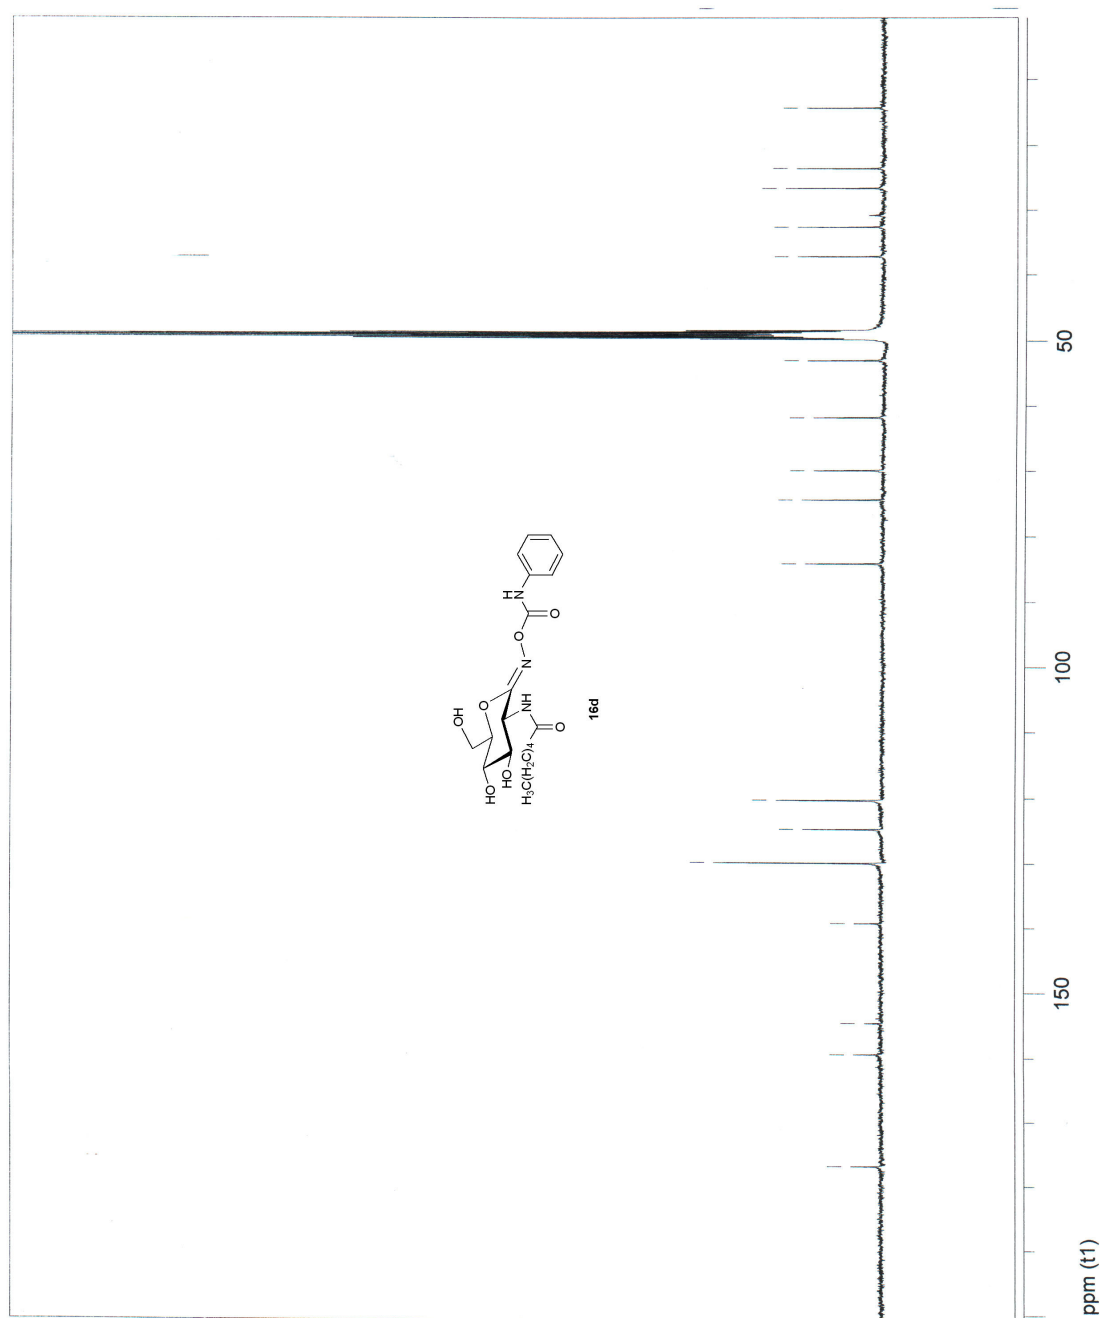

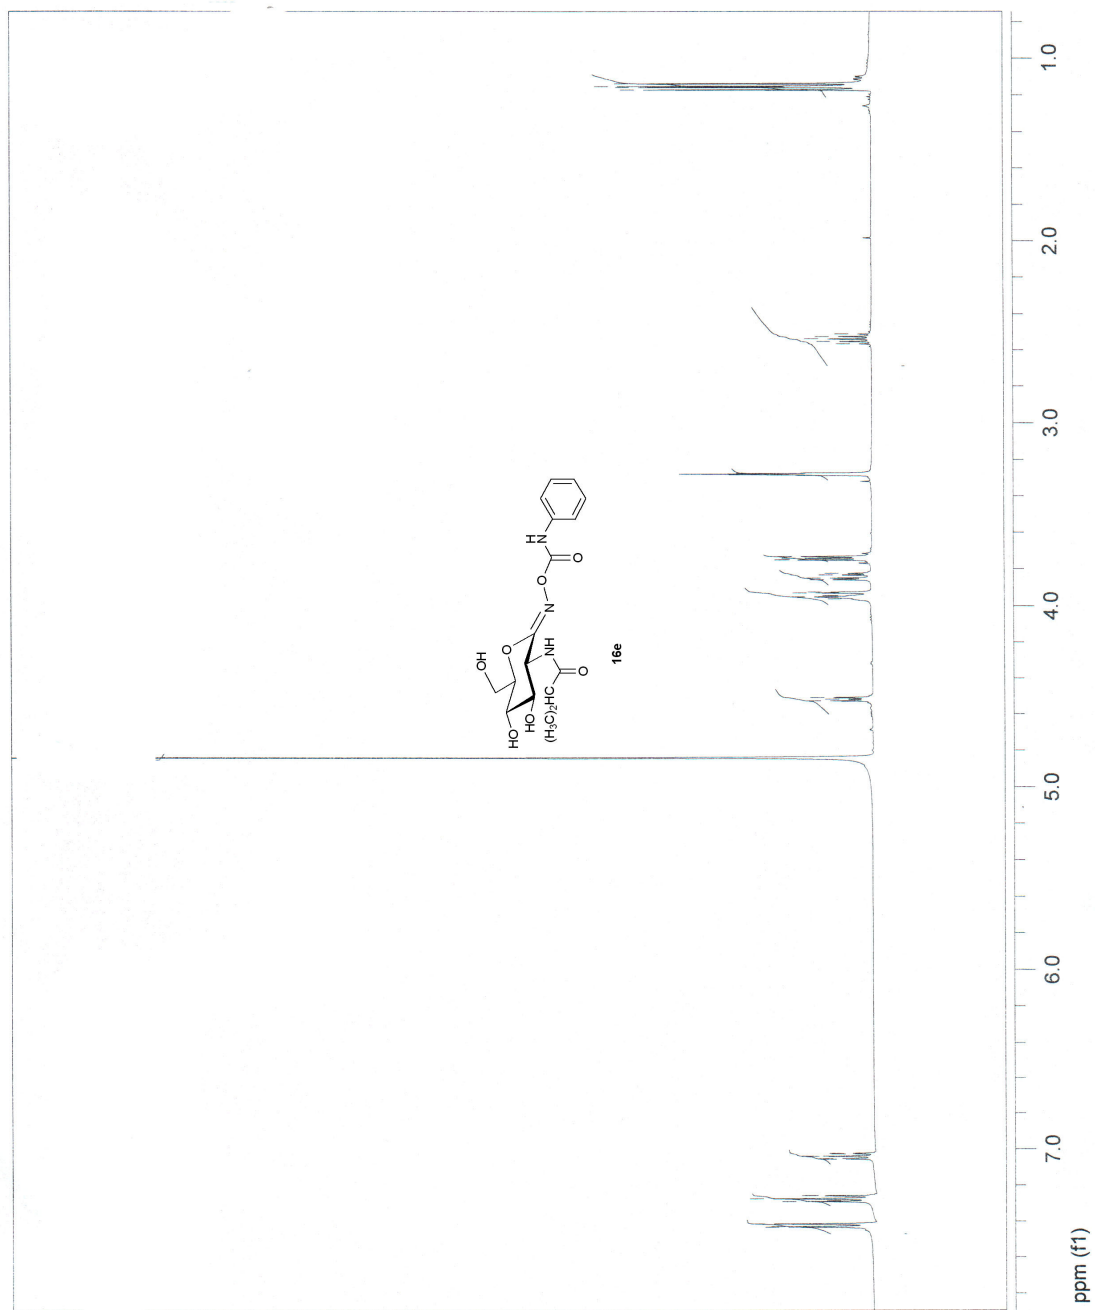

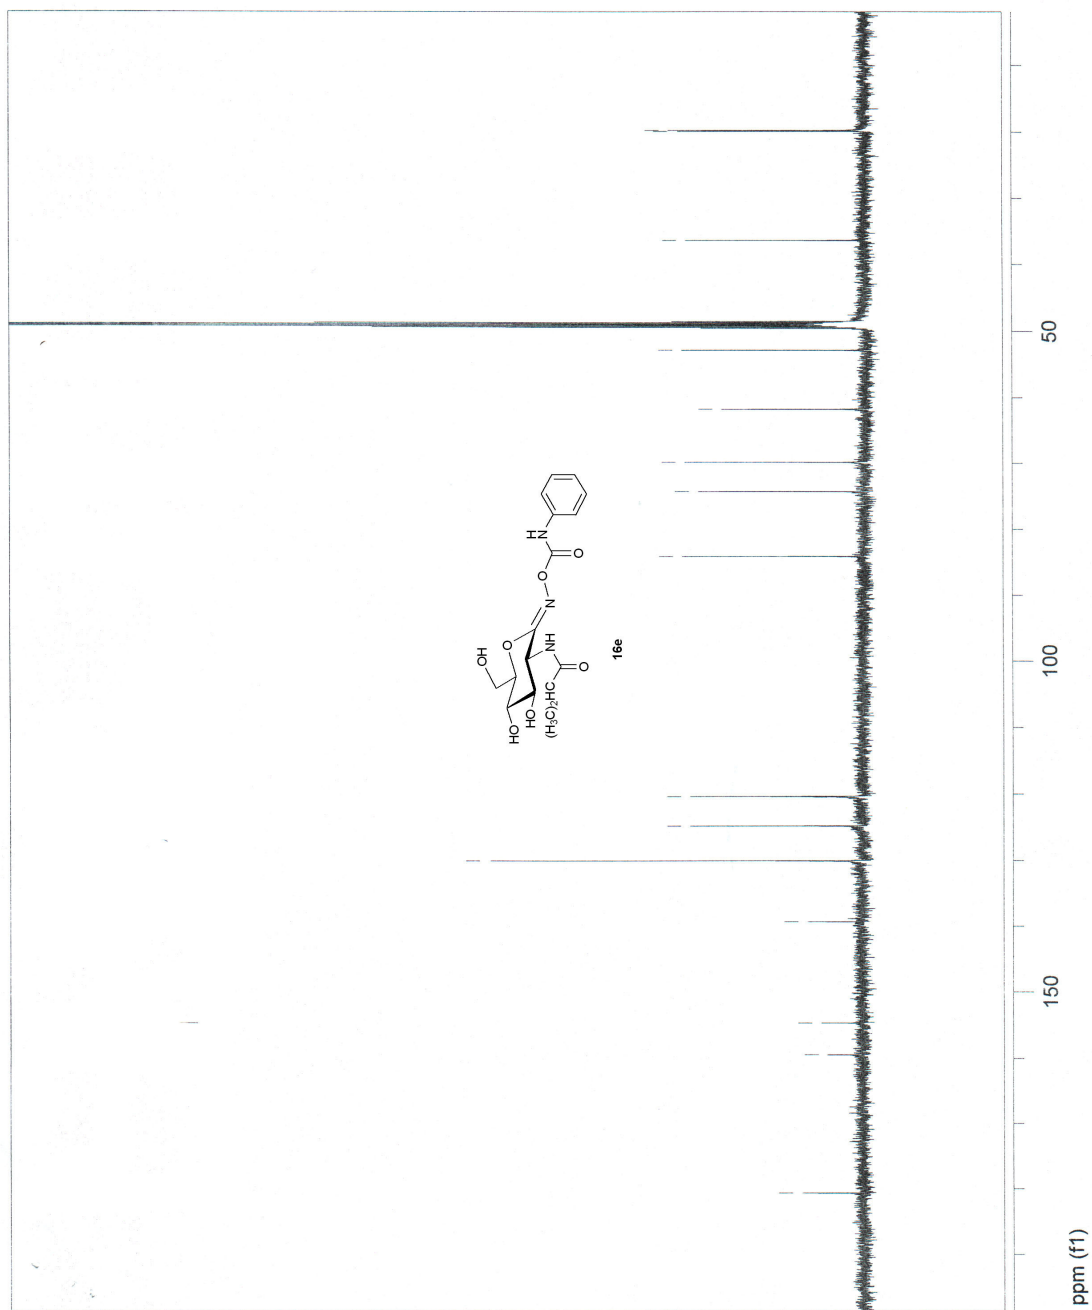

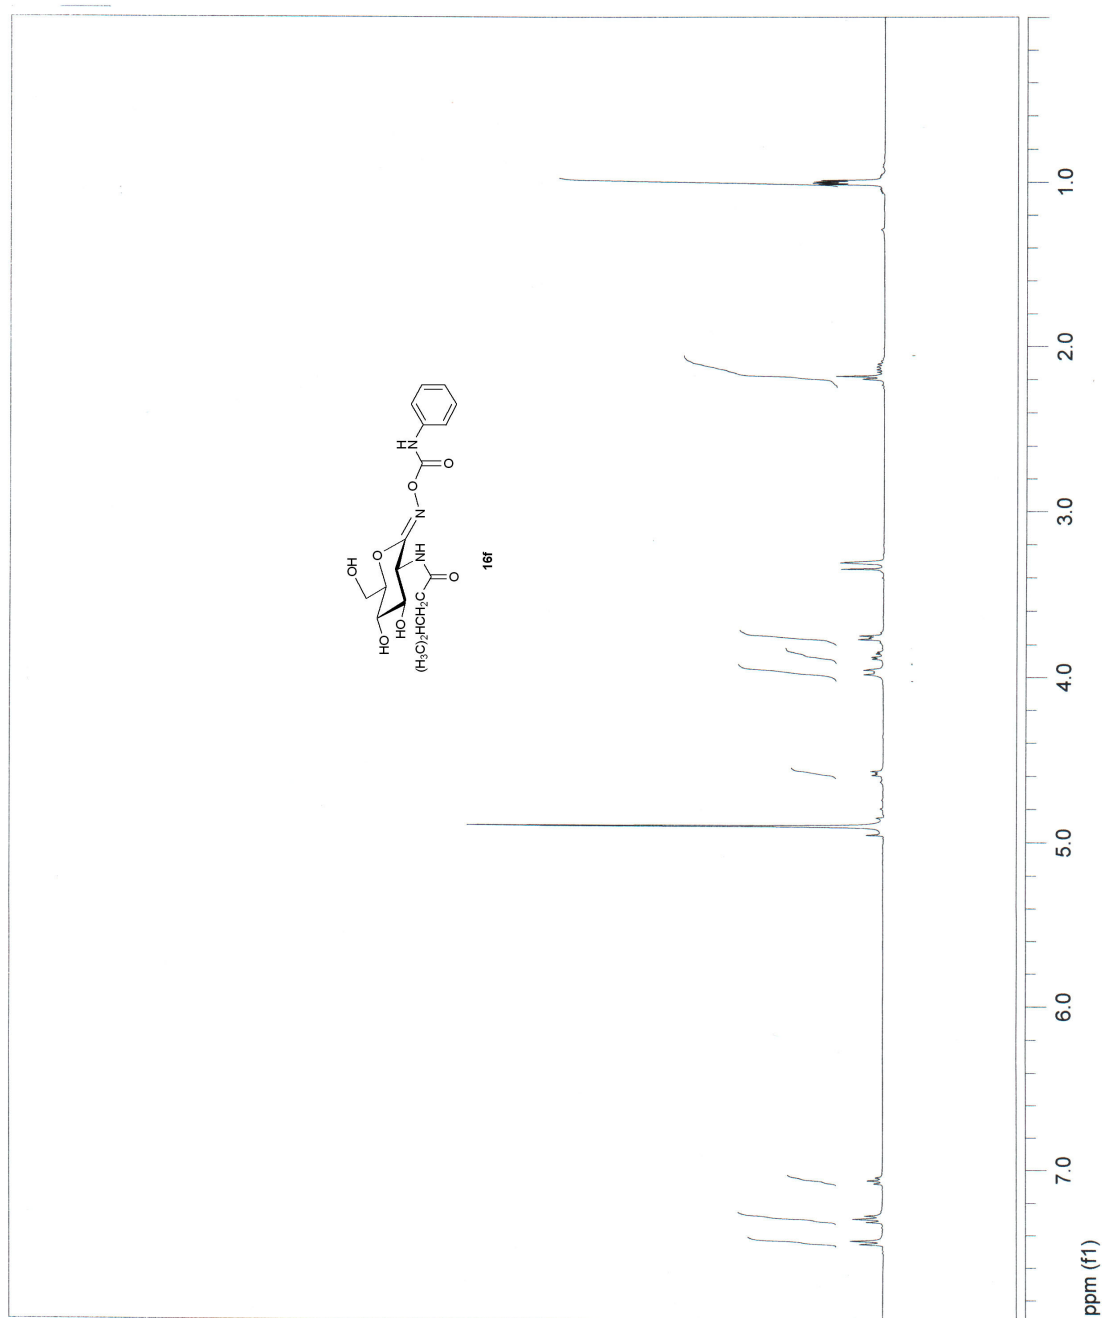

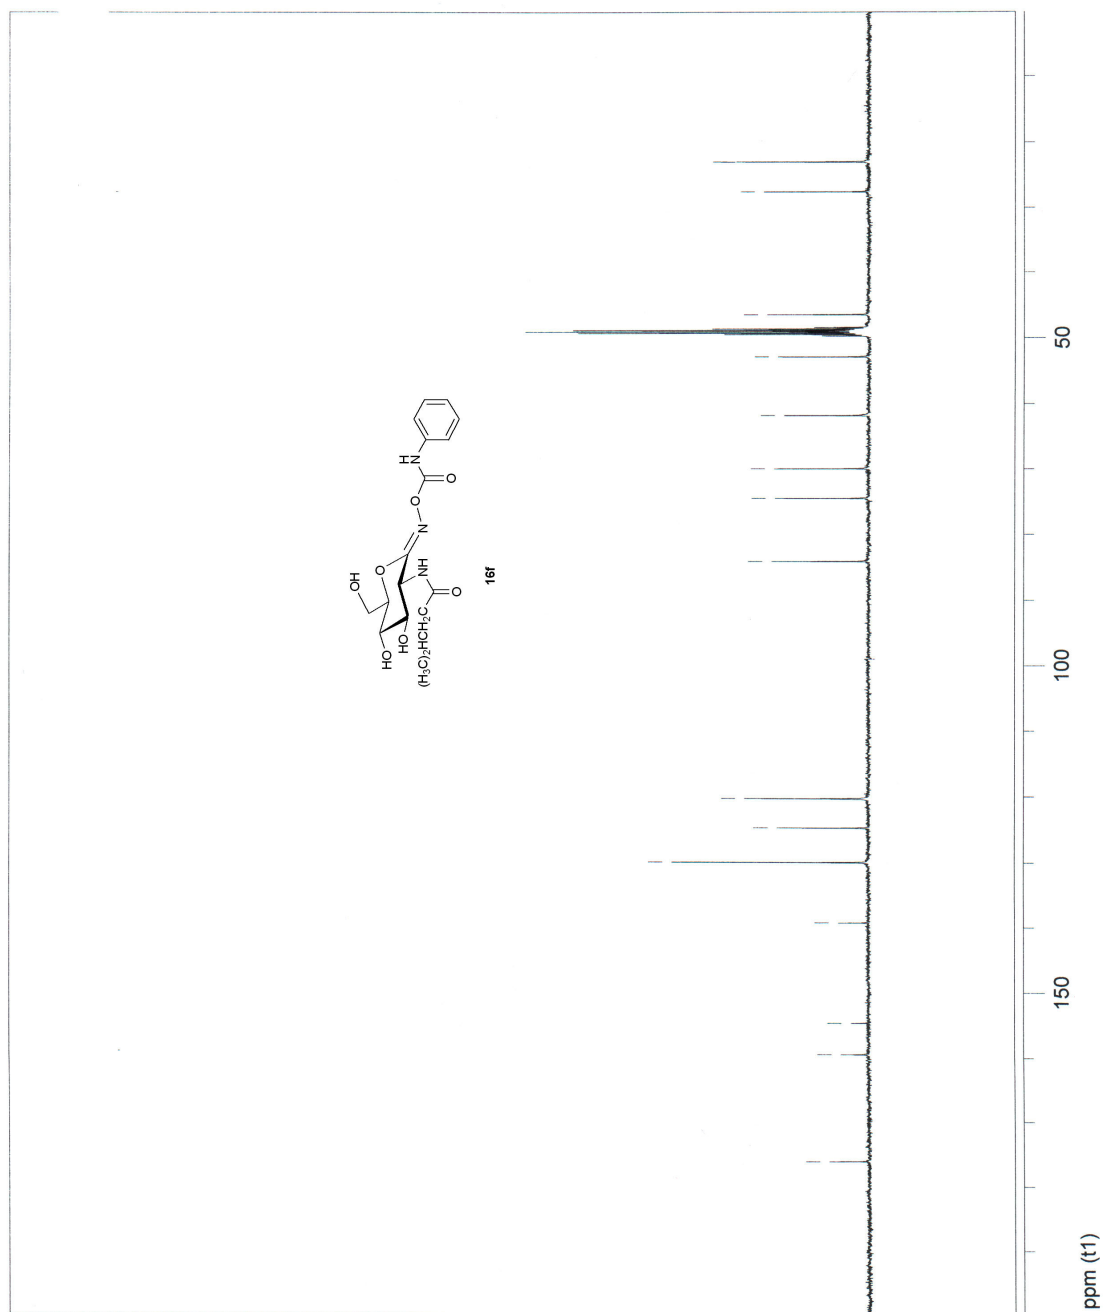

Supplement: b516273d.pdf [file b516273d.pdf]
